# Supplementary material for: Human mismatch repair system balances mutation rates between strands by removing more mismatches from the lagging strand
Source: PubMed Central journal article supplement — Genome Res. 2017 Aug;27(8):1336–43. doi: 10.1101/gr.219915.116 (PMC5538550; doi:10.1101/gr.219915.116), 2017-08
Supplement: supp_gr.219915.116_Supplemental_Figure_S1.pdf [file supp_gr.219915.116_Supplemental_Figure_S1.pdf]

### mutated pol epsilon

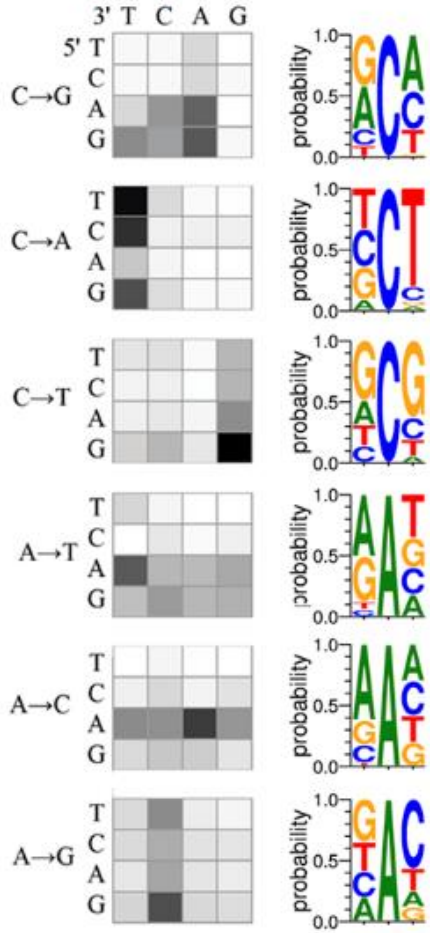

### mutated pol delta

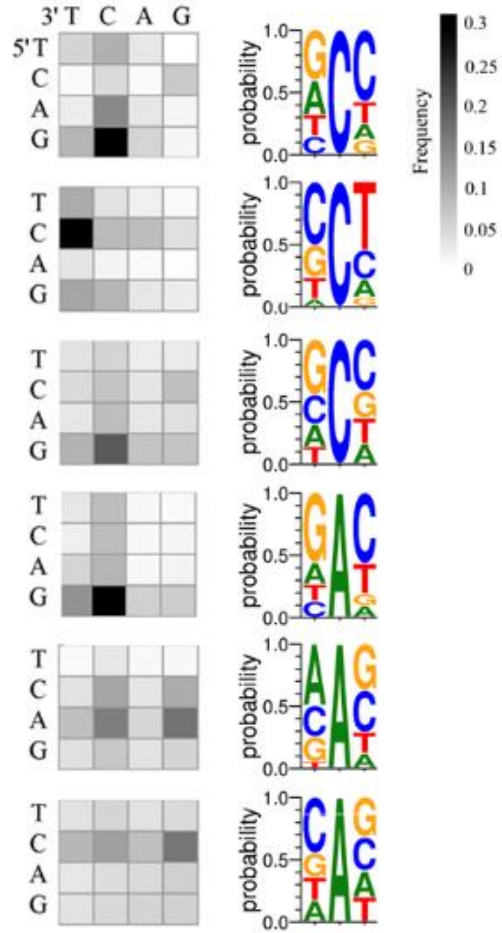

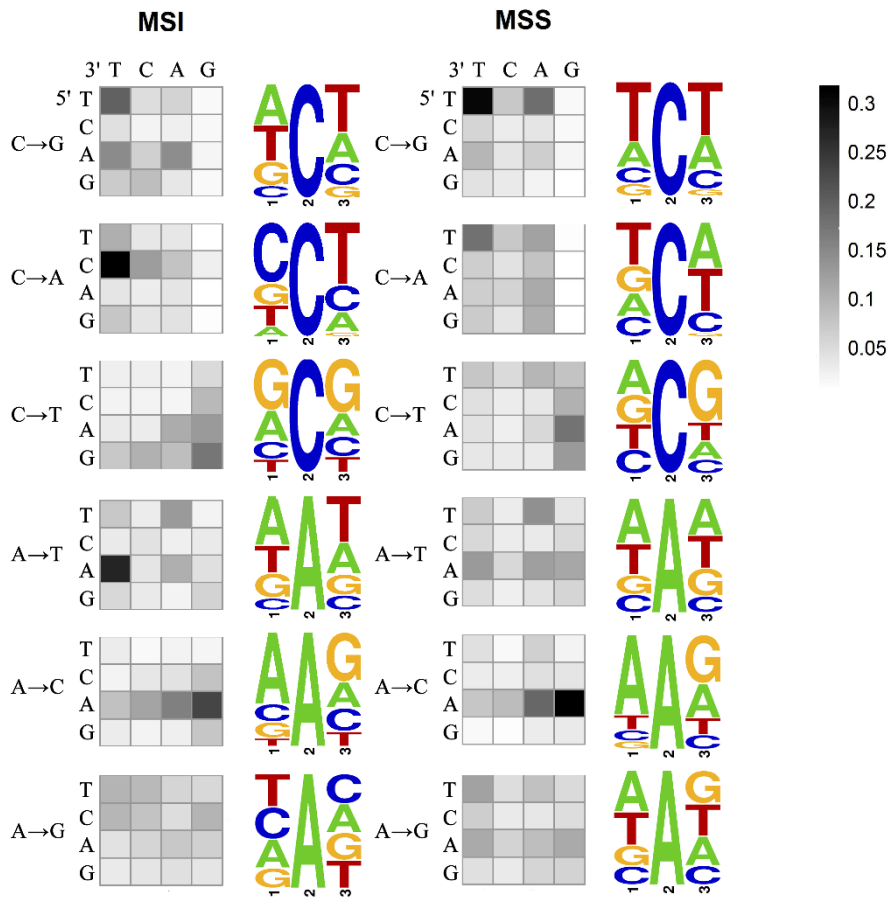

### Supplemental Figure S1.

Context-dependent mismatch frequency for each mutation type averaged between patients in each group. In the heat maps, the vertical axis corresponds to the 5' context of the substitution, and the horizontal axis, to the 3' context. For each single-nucleotide mutation type, the color of each of the 16 cells indicates how frequently this mutation occurs in this context. The sequence logos provide the same information.
