# Supplementary material for: Human mismatch repair system balances mutation rates between strands by removing more mismatches from the lagging strand
Source: PubMed Central journal article supplement — Genome Res. 2017 Aug;27(8):1336–43. doi: 10.1101/gr.219915.116 (PMC5538550; doi:10.1101/gr.219915.116), 2017-08
Supplement: supp_gr.219915.116_Supplemental_Figure_S4.pdf [file supp_gr.219915.116_Supplemental_Figure_S4.pdf]

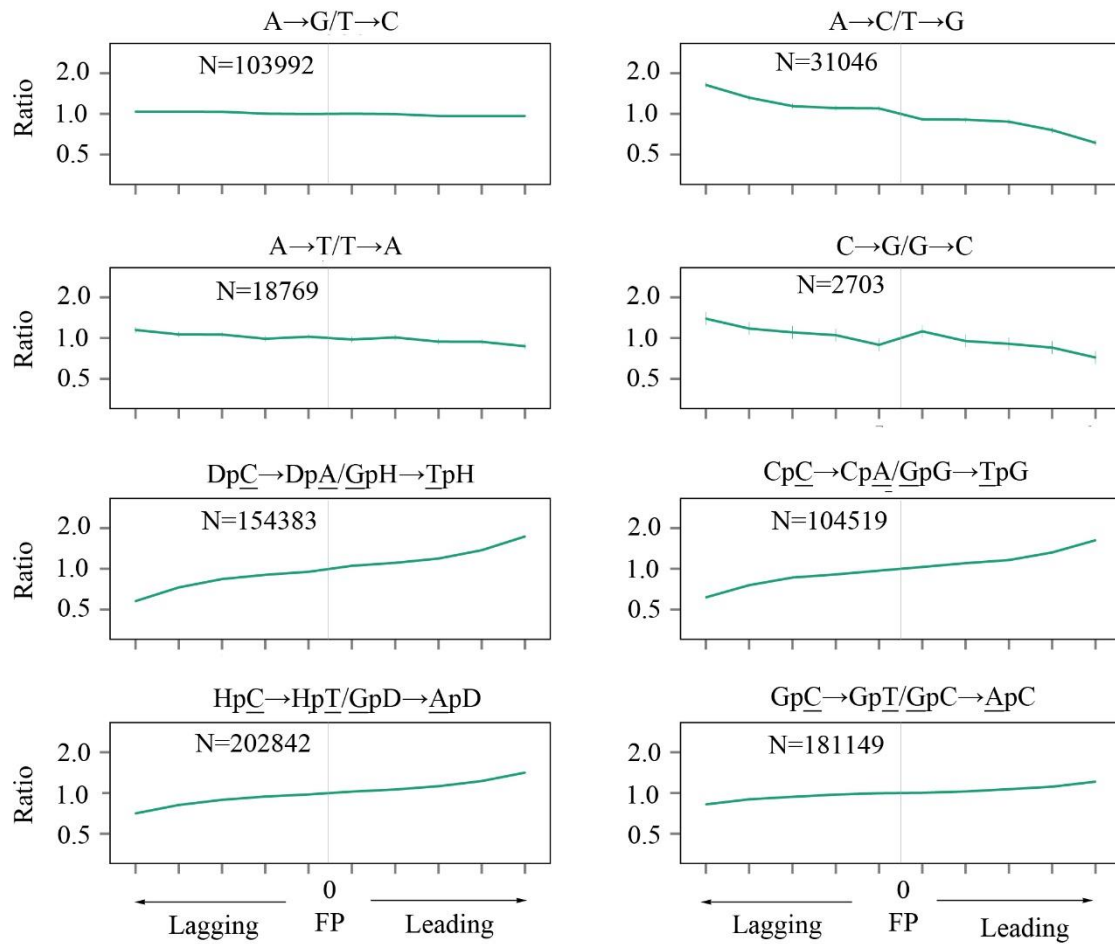

**Supplemental Figure S4.**

Strand asymmetry of substitutions in MMR-deficient UCEC cancers with mutated in pol epsilon.

Data for 1 genome from the TCGA database. Notations as in Fig. 2b.
