# Supplementary material for: Human mismatch repair system balances mutation rates between strands by removing more mismatches from the lagging strand
Source: PubMed Central journal article supplement — Genome Res. 2017 Aug;27(8):1336–43. doi: 10.1101/gr.219915.116 (PMC5538550; doi:10.1101/gr.219915.116), 2017-08
Supplement: supp_gr.219915.116_Supplemental_Figure_S6.pdf [file supp_gr.219915.116_Supplemental_Figure_S6.pdf]

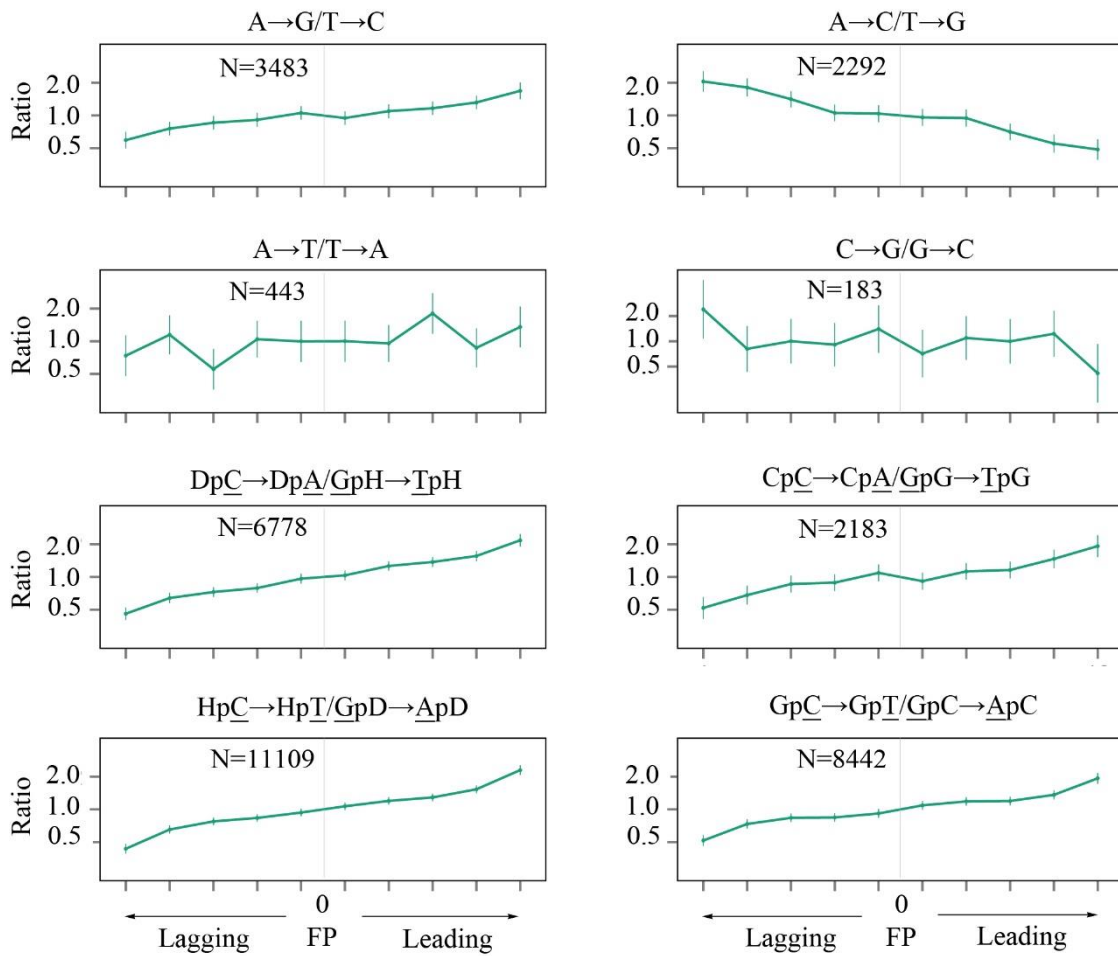

**Supplemental Figure S6.**

Strand asymmetry of substitutions in glioblastoma cancers (GBM) with mutation in the exonuclease domain of pol epsilon and homozygous germline mutation in MSH6 (MMR protein). Data for 3 exomes. Notations as in Fig. 2b.
