# Supplementary material for: Human mismatch repair system balances mutation rates between strands by removing more mismatches from the lagging strand
Source: PubMed Central journal article supplement — Genome Res. 2017 Aug;27(8):1336–43. doi: 10.1101/gr.219915.116 (PMC5538550; doi:10.1101/gr.219915.116), 2017-08
Supplement: supp_gr.219915.116_Supplemental_Figure_S7.pdf [file supp_gr.219915.116_Supplemental_Figure_S7.pdf]

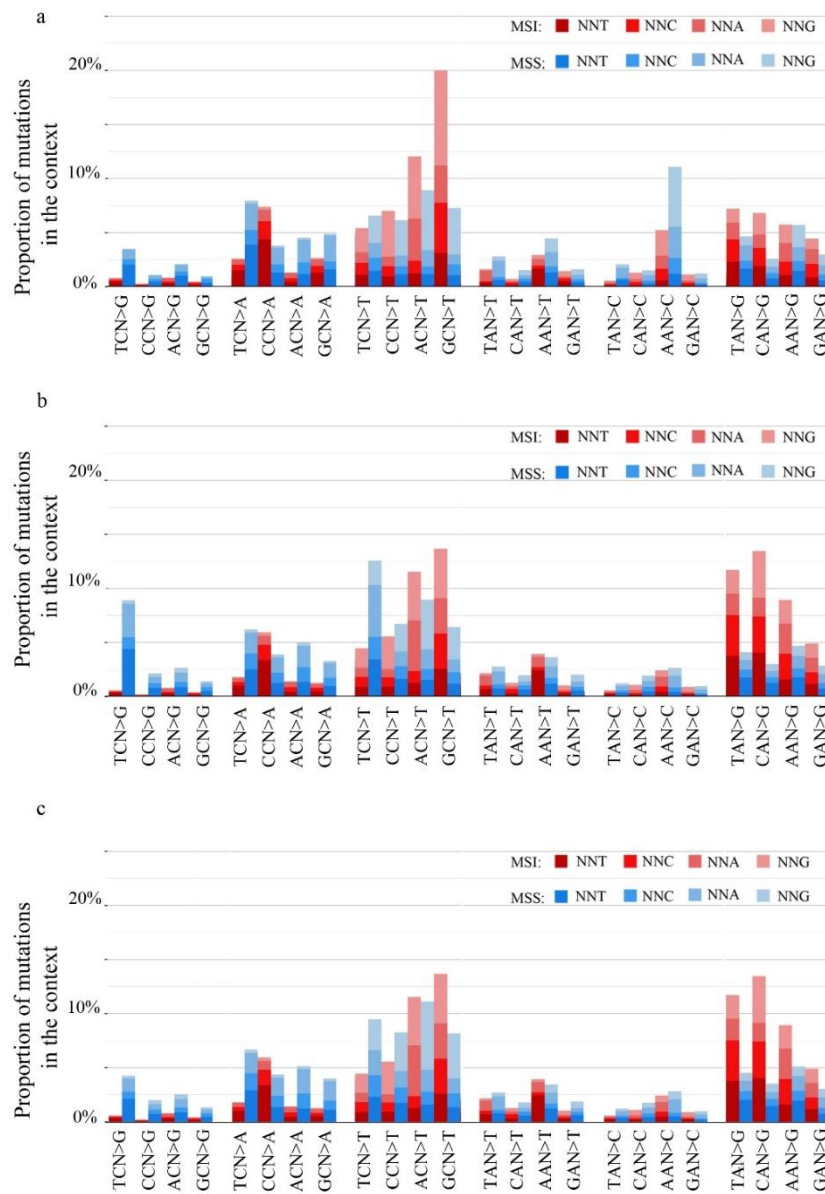

**Supplemental Figure S7.**

**Mutational spectra of MMR deficient and MMR proficient cancers. a,** Relative frequencies of the 96 mutation types (all possible mutation types in all possible tri-nucleotide contexts) in MSI and MSS cancers MSI (n = 3) and MSS (n = 8) colon adenocarcinoma samples; **b,** MSI (n = 7) and MSS (n = 19) uterine corpus endometrial carcinoma; **c,** MSI (n = 7) and MSS (n = 14) uterine corpus endometrial carcinoma excluding APOBEC enriched samples.
