# Supplementary material for: Human mismatch repair system balances mutation rates between strands by removing more mismatches from the lagging strand
Source: PubMed Central journal article supplement — Genome Res. 2017 Aug;27(8):1336–43. doi: 10.1101/gr.219915.116 (PMC5538550; doi:10.1101/gr.219915.116), 2017-08
Supplement: supp_gr.219915.116_Supplemental_Figure_S9.pdf [file supp_gr.219915.116_Supplemental_Figure_S9.pdf]

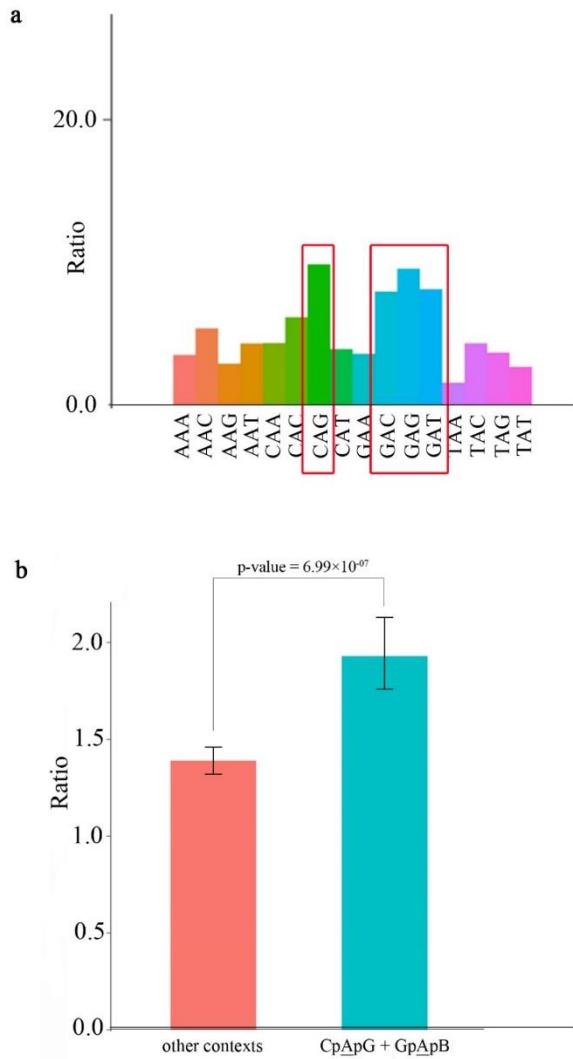

**Supplemental Figure S9.**

**A→C mutation is a minor signature of MMR. a,** Ratio of mutational rate for A→C mutation in all possible contexts in MSI caners to MSS cancers. Red frames denote the extreme values. **b,** The ratios of A→C mutation rate to T→G mutation rate on the leading strand in regions belonging to the most extreme replication direction bin in different contexts.
