# Supplementary material for: Human mismatch repair system balances mutation rates between strands by removing more mismatches from the lagging strand
Source: PubMed Central journal article supplement — Genome Res. 2017 Aug;27(8):1336–43. doi: 10.1101/gr.219915.116 (PMC5538550; doi:10.1101/gr.219915.116), 2017-08
Supplement: supp_gr.219915.116_Supplemental_Figure_S12.pdf [file supp_gr.219915.116_Supplemental_Figure_S12.pdf]

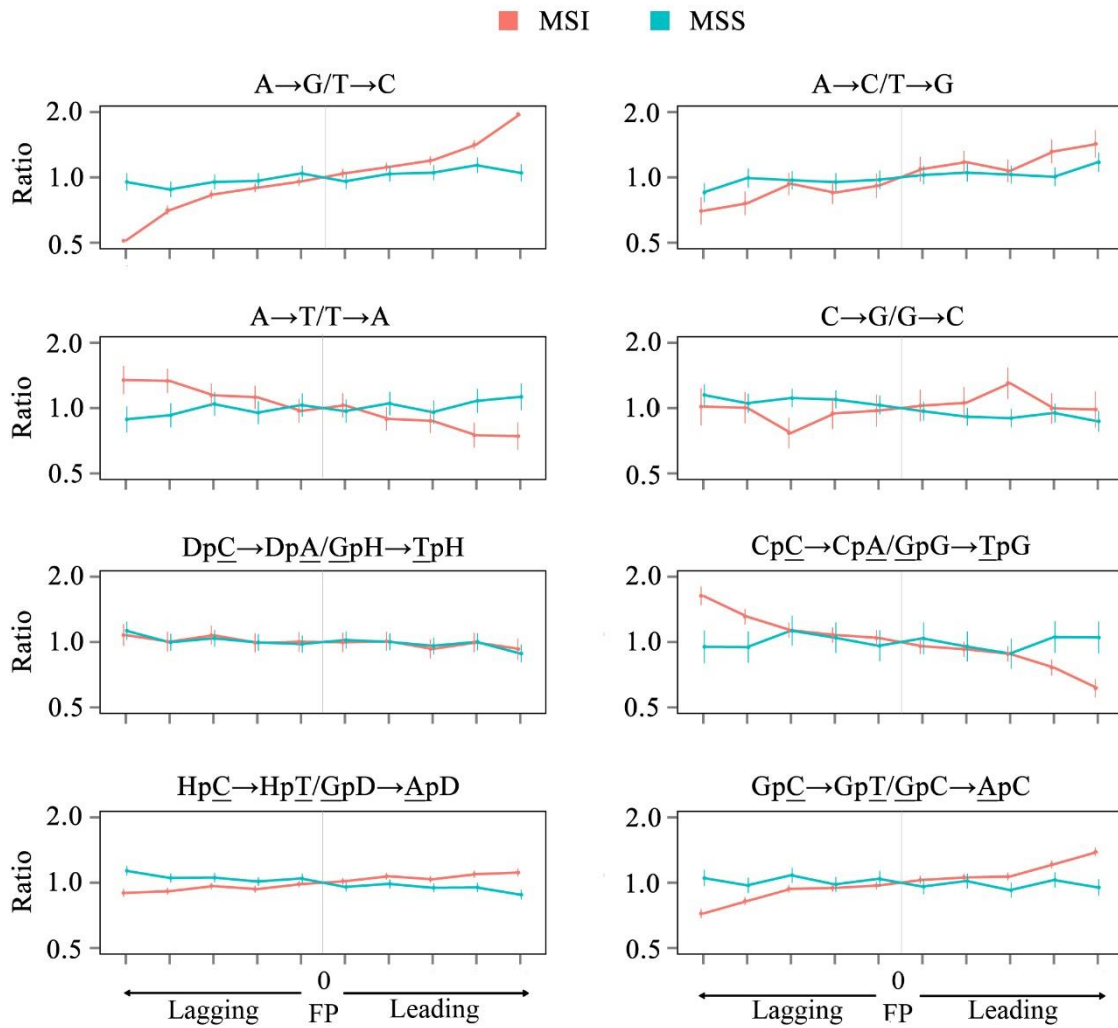

**Supplemental Figure S12.**

Strand asymmetry of substitutions in exomes. Data for 159 MSI exomes and 782 MSS exomes with wild type pol epsilon and pol delta from the TCGA database. Notations as in Fig. 2b.
