# Supplementary material for: Human mismatch repair system balances mutation rates between strands by removing more mismatches from the lagging strand
Source: PubMed Central journal article supplement — Genome Res. 2017 Aug;27(8):1336–43. doi: 10.1101/gr.219915.116 (PMC5538550; doi:10.1101/gr.219915.116), 2017-08
Supplement: supp_gr.219915.116_Supplemental_Figure_S13.pdf [file supp_gr.219915.116_Supplemental_Figure_S13.pdf]

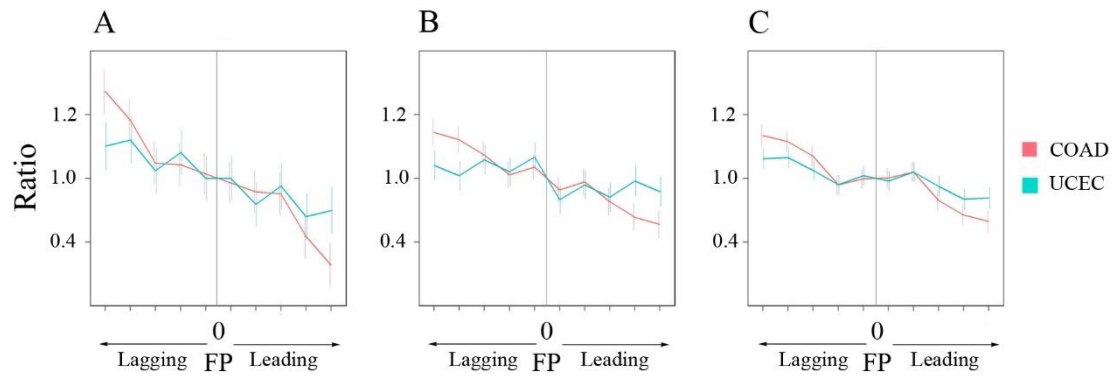

**Supplemental Figure S13.**

**Strand asymmetry of deletions.** Vertical axis, the ratio of the single nucleotide deletions rate in polyA tracts to single nucleotide deletions rate in polyT tracts in 10 MSI genomes (3 COAD samples and 7 UCEC samples). Notations as in Fig. 1. **a**, tract length 6 bp; **b**, tract length 7 bp; **c**, tract length 8 bp.
