# Supplementary material for: Human mismatch repair system balances mutation rates between strands by removing more mismatches from the lagging strand
Source: PubMed Central journal article supplement — Genome Res. 2017 Aug;27(8):1336–43. doi: 10.1101/gr.219915.116 (PMC5538550; doi:10.1101/gr.219915.116), 2017-08
Supplement: supp_gr.219915.116_Supplemental_Figure_S14.pdf [file supp_gr.219915.116_Supplemental_Figure_S14.pdf]

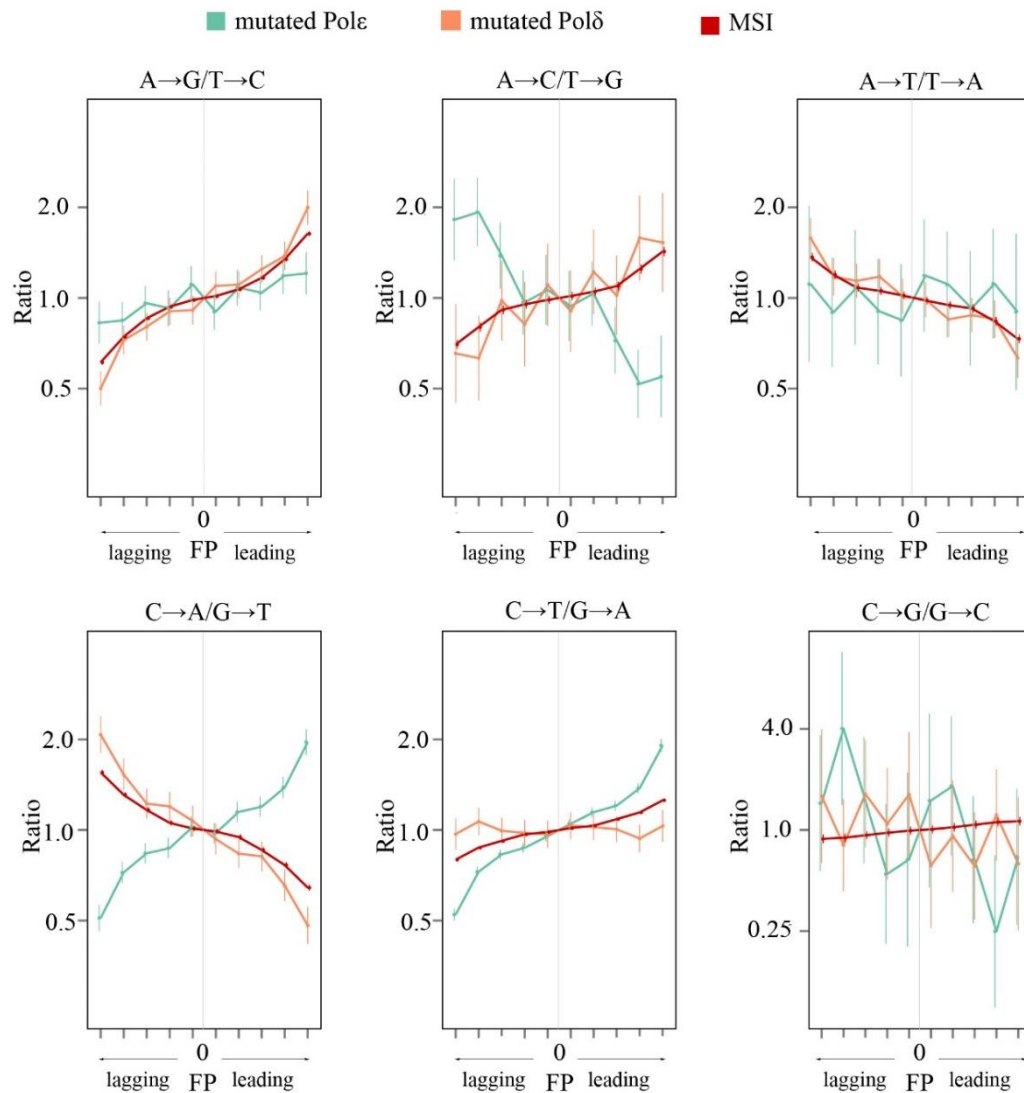

**Supplemental Figure S14.**

**Strand asymmetry of mutations in MSI cancers and in bMMRD cancers with mutated pol**

**epsilon and mutated pol delta cancers.** Horizontal axis, propensity of the replication fork to replicate the strand as lagging or leading. Vertical axis, the ratio of the frequencies of the two complementary mutation types on the strand in this category. Vertical bars represent 95% confidence intervals. Note the logarithmic vertical axis. Axes and notations same as in Fig. 2b.
