# Supplementary material for: Human mismatch repair system balances mutation rates between strands by removing more mismatches from the lagging strand
Source: PubMed Central journal article supplement — Genome Res. 2017 Aug;27(8):1336–43. doi: 10.1101/gr.219915.116 (PMC5538550; doi:10.1101/gr.219915.116), 2017-08
Supplement: supp_gr.219915.116_Supplemental_Figure_S15.pdf [file supp_gr.219915.116_Supplemental_Figure_S15.pdf]

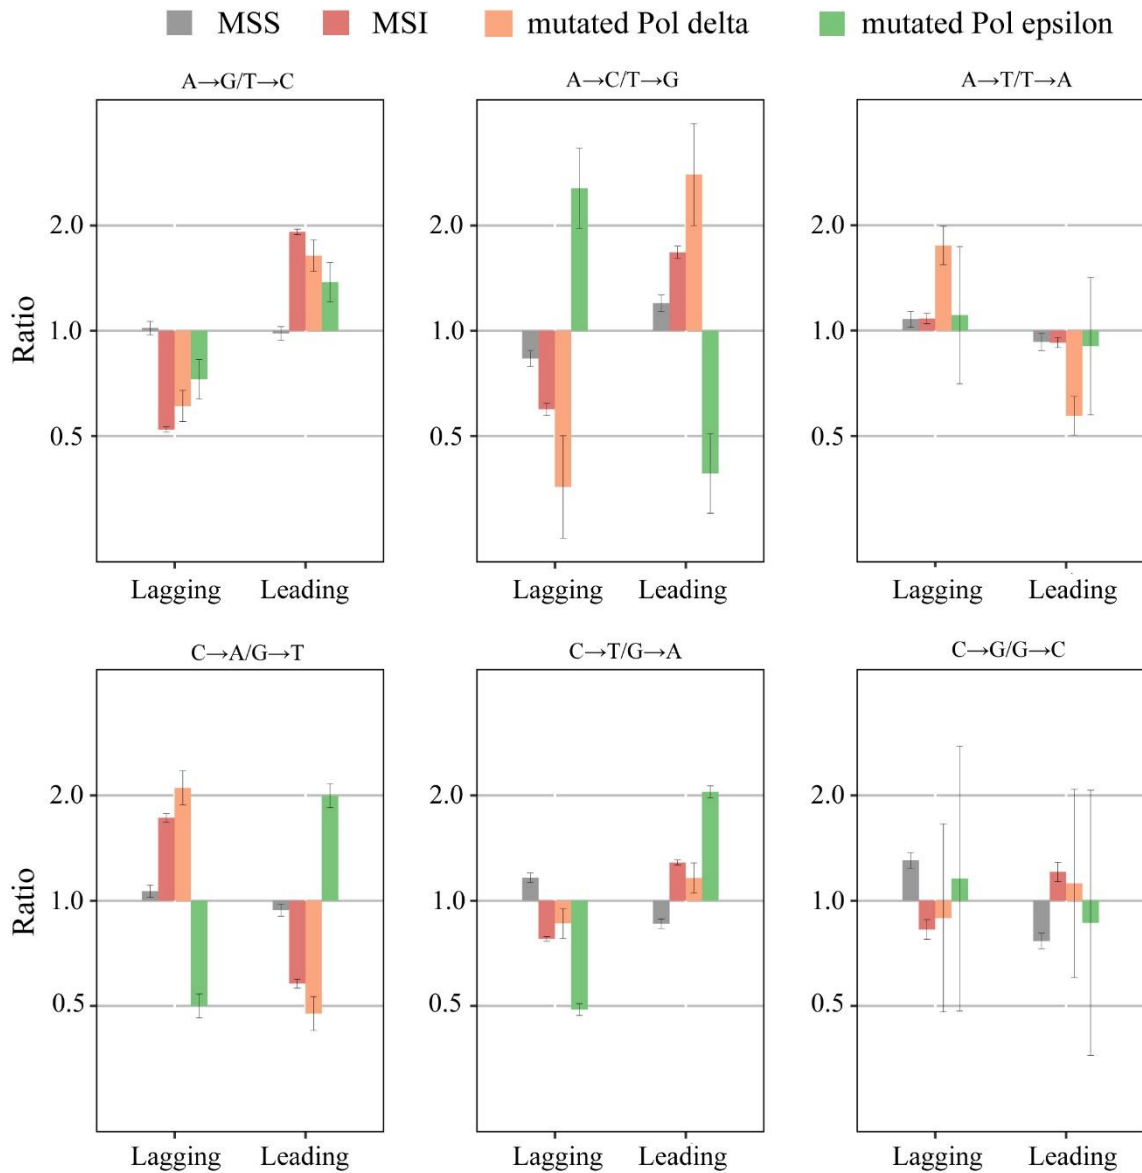

**Supplementary Figure S15.**

Strand asymmetry of mutations in MSI cancers and in bMMRD cancers with mutated pol epsilon and pol delta cancers with leading/lagging strand defined using ok-seq data. The asymmetry for complementary mutations in the 20% of the genome where replication asymmetry could be determined with the highest confidence. Error bars represent 95% confidence intervals.
