# Supplementary material for: Human mismatch repair system balances mutation rates between strands by removing more mismatches from the lagging strand
Source: PubMed Central journal article supplement — Genome Res. 2017 Aug;27(8):1336–43. doi: 10.1101/gr.219915.116 (PMC5538550; doi:10.1101/gr.219915.116), 2017-08
Supplement: supp_gr.219915.116_Supplemental_Figure_S16.pdf [file supp_gr.219915.116_Supplemental_Figure_S16.pdf]

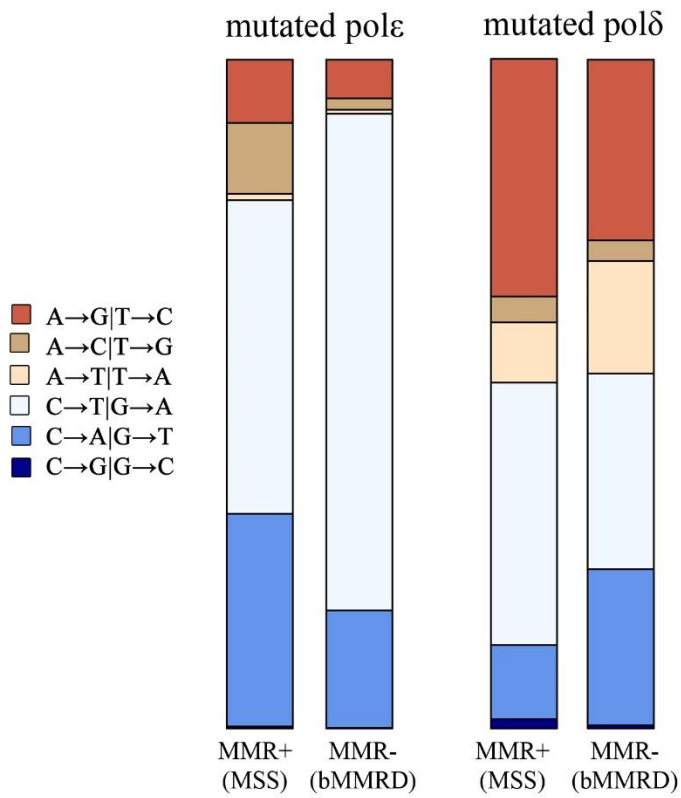

**Supplemental Figure S16.**

Relative frequencies of single-nucleotide substitutions irrespective of the strand in MMR-efficient (MMR+) and MMR-deficient (MMR-) cancer samples with mutations in the conserved domains of pol epsilon or pol delta.
