# Supplementary material for: Human mismatch repair system balances mutation rates between strands by removing more mismatches from the lagging strand
Source: PubMed Central journal article supplement — Genome Res. 2017 Aug;27(8):1336–43. doi: 10.1101/gr.219915.116 (PMC5538550; doi:10.1101/gr.219915.116), 2017-08
Supplement: supp_gr.219915.116_Supplemental_Figure_S17.pdf [file supp_gr.219915.116_Supplemental_Figure_S17.pdf]

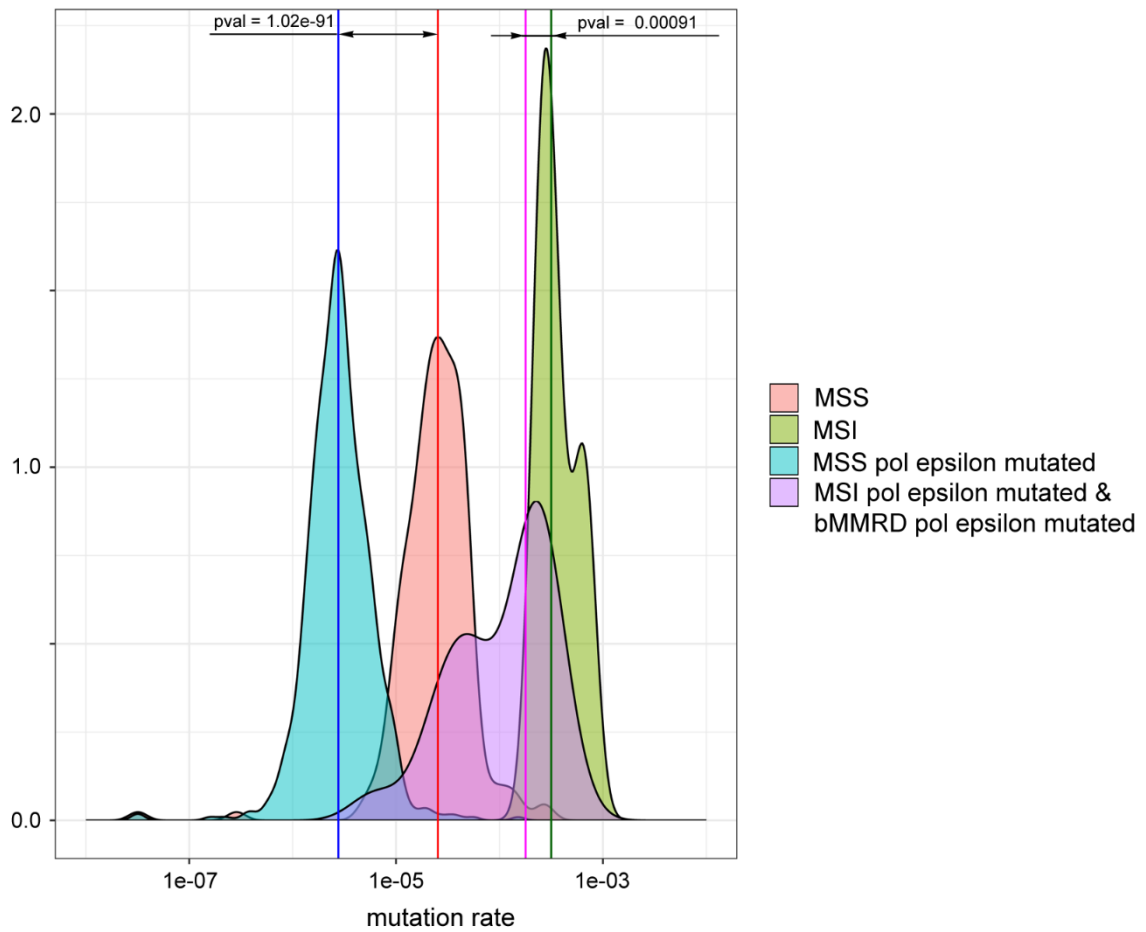

**Supplemental Figure S17.**

Distribution of mutation rates in samples with proficient and deficient MMR and mutations in polymerase epsilon. Vertical lines correspond to median values of distributions (colored by type). Note logarithmic scale of X-axis.
