# Supplementary material for: Human mismatch repair system balances mutation rates between strands by removing more mismatches from the lagging strand
Source: PubMed Central journal article supplement — Genome Res. 2017 Aug;27(8):1336–43. doi: 10.1101/gr.219915.116 (PMC5538550; doi:10.1101/gr.219915.116), 2017-08
Supplement: supp_gr.219915.116_Supplemental_Figure_S18.pdf [file supp_gr.219915.116_Supplemental_Figure_S18.pdf]

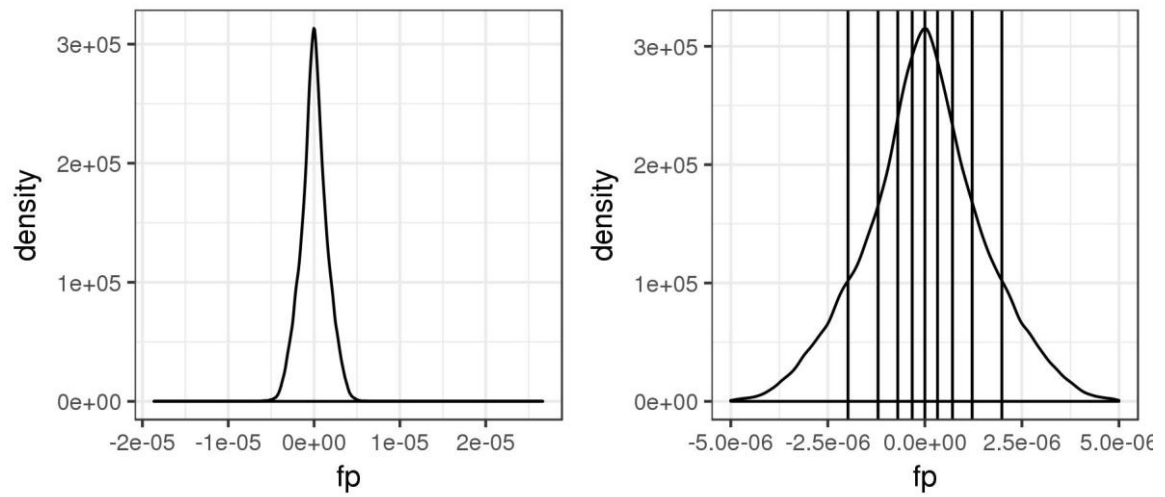

**Supplementary Figure S18.**

Distribution of fork polarity values along the genome. FP was averaged within 10 kb windows.

**a**, overall distribution for the whole genome; **b**, zoomed in distribution with vertical lines corresponding to quartiles used as cut-offs for binning.
