# Supplementary material for: Human mismatch repair system balances mutation rates between strands by removing more mismatches from the lagging strand
Source: PubMed Central journal article supplement — Genome Res. 2017 Aug;27(8):1336–43. doi: 10.1101/gr.219915.116 (PMC5538550; doi:10.1101/gr.219915.116), 2017-08
Supplement: supp_gr.219915.116_Supplemental_Table_S1.pdf [file supp_gr.219915.116_Supplemental_Table_S1.pdf]

**Supplemental Table S1.**

Cosine distances between signatures from COSMIC database and mutational spectra observed in samples with mutated pol epsilon. Signatures with cosine distance more than 0.7 even for one comparison are shown. Cosine distances more than 0.7 are shown in bold.

| <b>Signature</b> | <b>MSS<br/>pol epsilon<br/>mutated</b> | <b>MSI<br/>pol epsilon<br/>mutated</b> | <b>bMMRD<br/>pol epsilon<br/>mutated</b> |
|------------------|----------------------------------------|----------------------------------------|------------------------------------------|
| Signature 1      | 0.21                                   | 0.67                                   | <b>0.80</b>                              |
| Signature 6      | 0.17                                   | <b>0.87</b>                            | <b>0.84</b>                              |
| Signature 10     | <b>0.92</b>                            | 0.35                                   | 0.55                                     |
| Signature 14     | 0.33                                   | <b>0.97</b>                            | <b>0.74</b>                              |
| Signature 15     | 0.18                                   | <b>0.81</b>                            | <b>0.79</b>                              |
| Signature 20     | 0.16                                   | <b>0.73</b>                            | 0.41                                     |
