# Supplementary material for: Human mismatch repair system balances mutation rates between strands by removing more mismatches from the lagging strand
Source: PubMed Central journal article supplement — Genome Res. 2017 Aug;27(8):1336–43. doi: 10.1101/gr.219915.116 (PMC5538550; doi:10.1101/gr.219915.116), 2017-08
Supplement: supp_gr.219915.116_Supplemental_Table_S2.pdf [file supp_gr.219915.116_Supplemental_Table_S2.pdf]

## Supplemental Table S2.

Replication asymmetry in the most extreme bin and in the entire dataset for bMMRD cancers (5 exomes with mutated pol epsilon and 2 exomes with mutated pol delta). The values in brackets are 95% confidence intervals. Asterisks denote significance of the deviation from 1.

\*p:<0.05, \*\*:p< 0.001, \*\*\*:p<0.001.

|                 | Mutated pol epsilon |                     | Mutated pol delta   |                     |
|-----------------|---------------------|---------------------|---------------------|---------------------|
|                 | Rightmost bin       | Entire dataset      | Rightmost bin       | Entire dataset      |
| A→G/T→C         | 1.21 (1.03-1.42)*   | 1.07 (1.00-1.14)*   | 2.00 (1.75-2.28)*** | 1.30 (1.23-1.36)*** |
| A→C/T→G         | 0.55 (0.40-0.75)*** | 0.74 (0.66-0.83)*** | 1.53 (1.05-2.23)*   | 1.20 (1.04-1.39)*   |
| A→T/T→A         | 0.90 (0.49-1.63)    | 1.06 (0.87-1.29)    | 0.63 (0.54-0.74)*** | 0.84 (0.79-0.90)*** |
| C→G/G→C         | 0.69 (0.27-1.76)    | 0.75 (0.49-1.15)    | 0.63 (0.25-1.57)    | 0.82 (0.58-1.15)    |
| DpC→DpA/GpH→TpH | 1.95 (1.73-2.20)*** | 1.27 (1.21-1.32)*** | 0.41 (0.34-0.51)*** | 0.71 (0.66-0.76)*** |
| CpC→CpA/GpG→TpG | 1.97 (1.65-2.34)*** | 1.23 (1.15-1.31)*** | 0.55 (0.45-0.66)*** | 0.78 (0.73-0.84)*** |
| HpC→HpT/GpD→ApD | 2.10 (1.96-2.25)*** | 1.30 (1.27-1.34)*** | 0.99 (0.84-1.16)    | 0.95 (0.89-1.01)    |
| GpC→GpT/GpC→ApC | 1.92 (1.80-2.06)*** | 1.27 (1.24-1.30)*** | 1.22 (1.02-1.46)*   | 1.11 (1.03-1.19)**  |
