# Supplementary material for: Human mismatch repair system balances mutation rates between strands by removing more mismatches from the lagging strand
Source: PubMed Central journal article supplement — Genome Res. 2017 Aug;27(8):1336–43. doi: 10.1101/gr.219915.116 (PMC5538550; doi:10.1101/gr.219915.116), 2017-08
Supplement: supp_gr.219915.116_Supplemental_Table_S3.pdf [file supp_gr.219915.116_Supplemental_Table_S3.pdf]

**Supplemental Table S3.**

The ratios of complementary mutation rates on the leading strand in regions belonging to the most extreme replication direction bin for individual exomes of bMMRD cancers with mutated polymerases. The values in brackets are 95% confidence intervals. For C→G mutations, there was not enough data for individual patient to estimate the asymmetry level.

| Sample | Mutated polymerase | A→G              | A→C              | A→T               | DpC→DpA          | CpC→CpA          | HpC→HpT          | GpC→GpT          |
|--------|--------------------|------------------|------------------|-------------------|------------------|------------------|------------------|------------------|
| D1119  | pol epsilon        | 1.22 (0.86-1.74) | 0.59 (0.29-1.20) | 0.33 (0.08-1.43)  | 2.12 (1.57-2.86) | 1.68 (1.14-2.48) | 2.44 (1.88-3.18) | 2.03 (1.62-2.53) |
| D1121  | pol epsilon        | 1.33 (0.86-2.05) | 0.62 (0.29-1.34) | 0.99 (0.27-3.61)  | 2.28 (1.63-3.19) | 3.74 (2.00-6.99) | 2.38 (1.84-3.08) | 1.83 (1.46-2.30) |
| D1144  | pol epsilon        | 1.20 (0.82-1.77) | 0.82 (0.36-1.86) | 4.94 (1.22-20.06) | 1.70 (1.38-2.10) | 1.90 (1.46-2.48) | 2.24 (1.89-2.65) | 1.80 (1.61-2.00) |
| D132   | pol epsilon        | 1.20 (0.91-1.57) | 0.47 (0.28-0.8)  | 0.28 (0.07-1.20)  | 2.29 (1.75-3.00) | 2.48 (1.32-4.66) | 2.06 (1.75-2.42) | 2.11 (1.87-2.38) |
| D134   | pol epsilon        | 1.12 (0.73-1.71) | 0.44 (0.21-0.96) | 0.66 (0.13-3.30)  | 1.75 (1.32-2.30) | 1.68 (1.14-2.48) | 1.83 (1.50-2.24) | 1.86 (1.52-2.27) |
| 60001  | pol epsilon        | 2.19 (1.69-2.82) | 0.51 (0.4-0.66)  | 2.37 (1.15-4.88)  | 2.34 (1.90-2.87) | 2.20 (1.30-3.70) | 2.34 (2.05-2.68) | 1.99 (1.62-2.43) |
| 60003  | pol epsilon        | 0.99 (0.69-1.42) | 0.47 (0.26-0.84) | 1.29 (0.64-2.62)  | 2.34 (1.82-3.02) | 1.95 (1.36-2.8)  | 2.18 (1.75-2.73) | 1.83 (1.51-2.21) |
| 60004  | pol epsilon        | 1.65 (1.18-2.31) | 0.41 (0.24-0.69) | 0.58 (0.23-1.42)  | 1.84 (1.45-2.34) | 1.78 (1.24-2.55) | 2.28 (1.80-2.88) | 2.01 (1.64-2.46) |
| D1120  | pol delta          | 2.03 (1.60-2.58) | 1.98 (0.54-7.21) | 1.25 (0.69-2.26)  | 0.44 (0.29-0.66) | 0.65 (0.49-0.85) | 0.49 (0.33-0.73) | 0.89 (0.58-1.36) |
| D1122  | pol delta          | 1.99 (1.70-2.32) | 1.5 (1.01-2.21)  | 0.60 (0.51-0.71)  | 0.41 (0.32-0.52) | 0.47 (0.36-0.62) | 0.92 (0.72-1.16) | 1.31 (1.07-1.60) |
