# Supplementary material for: Human mismatch repair system balances mutation rates between strands by removing more mismatches from the lagging strand
Source: PubMed Central journal article supplement — Genome Res. 2017 Aug;27(8):1336–43. doi: 10.1101/gr.219915.116 (PMC5538550; doi:10.1101/gr.219915.116), 2017-08
Supplement: supp_gr.219915.116_Supplemental_Table_S4.pdf [file supp_gr.219915.116_Supplemental_Table_S4.pdf]

**Supplemental Table S4.**

Damaging mutations in MMR genes in MSI samples.

| Sample       | Cancer type | Gene | chr | Pos start | Pos end  | Type              | Ref | Alt | Cosmic ID   |
|--------------|-------------|------|-----|-----------|----------|-------------------|-----|-----|-------------|
| TCGA-AA-3516 | COAD        | MSH6 | 2   | 48027196  | 48027196 | Frame_Shift_Del   | A   | -   | -           |
|              |             | MSH6 | 2   | 48030640  | 48030640 | Frame_Shift_Del   | C   | -   | COSM330655  |
| TCGA-AA-A01R | COAD        | PMS2 | 7   | 6018236   | 6018236  | Missense_Mutation | C   | T   | COSM179343  |
|              |             | PMS2 | 7   | 6038813   | 6038813  | Nonsense_Mutation | G   | A   | COSM179354  |
| TCGA-A5-A0GA | UCEC        | MSH6 | 2   | 48030639  | 48030640 | INS               | -   | C   | COSM308681  |
|              | UCEC        | PMS2 | 7   | 6029581   | 6029581  | Missense_Mutation | C   | T   | COSM1091091 |
| TCGA-AP-A054 | UCEC        | MSH6 | 2   | 48030639  | 48030640 | INS               | -   | C   | COSM308681  |
