# Supplementary material for: Human mismatch repair system balances mutation rates between strands by removing more mismatches from the lagging strand
Source: PubMed Central journal article supplement — Genome Res. 2017 Aug;27(8):1336–43. doi: 10.1101/gr.219915.116 (PMC5538550; doi:10.1101/gr.219915.116), 2017-08
Supplement: supp_gr.219915.116_Supplemental_Table_S6.pdf [file supp_gr.219915.116_Supplemental_Table_S6.pdf]

**Supplemental Table S6.**

APOBEC enrichment and weights of mutational signatures associated with APOBEC activity (Signatures 2 and 13) for MSS cancers. Samples in *italic* were excluded from the analysis as APOBEC enriched.

| Patient             | APOBEC enrichment | Signature 2 weight | Signature 13 weight | Cancer type |
|---------------------|-------------------|--------------------|---------------------|-------------|
| TCGA-A6-2681        | 1.04              | 0                  | 0                   | COAD        |
| TCGA-A6-2683        | 1.24              | 0                  | 0                   | COAD        |
| TCGA-AA-3666        | 1.81              | 0                  | 0                   | COAD        |
| TCGA-AA-3956        | 1.56              | 0                  | 0                   | COAD        |
| TCGA-AA-A01S        | 1.43              | 0                  | 0                   | COAD        |
| TCGA-AA-A02O        | 1.68              | 0                  | 0                   | COAD        |
| TCGA-AA-A02Y        | 1.38              | 0                  | 0                   | COAD        |
| TCGA-AA-A03F        | 1.27              | 0                  | 0                   | COAD        |
| TCGA-A5-A0GE        | 1.26              | 0                  | 0                   | UCEC        |
| TCGA-AP-A052        | 1.43              | 0                  | 0                   | UCEC        |
| TCGA-AP-A053        | 1.35              | 0                  | 0                   | UCEC        |
| TCGA-AP-A05A        | 2.46              | 0                  | 0.0892              | UCEC        |
| TCGA-AP-A05D        | 1.46              | 0                  | 0                   | UCEC        |
| TCGA-AP-A0L8        | 1.04              | 0                  | 0                   | UCEC        |
| <i>TCGA-AP-A0L9</i> | 3.93              | 0.1023             | 0.1357              | UCEC        |
| TCGA-AP-A0LH        | 1.69              | 0                  | 0                   | UCEC        |
| <i>TCGA-AP-A0LI</i> | 6.06              | 0.1567             | 0.1676              | UCEC        |
| TCGA-AP-A0LL        | 1.16              | 0                  | 0                   | UCEC        |
| TCGA-AP-A0LO        | 1.01              | 0                  | 0                   | UCEC        |
| <i>TCGA-B5-A0JN</i> | 3.19              | 0.0685             | 0.1098              | UCEC        |
| <i>TCGA-BK-A0CC</i> | 5.96              | 0.1496             | 0.1616              | UCEC        |
| TCGA-BS-A0TC        | 2.69              | 0                  | 0                   | UCEC        |
| TCGA-BS-A0TD        | 1.07              | 0                  | 0                   | UCEC        |
| TCGA-BS-A0TG        | 1.30              | 0                  | 0                   | UCEC        |
| <i>TCGA-D1-A16G</i> | 3.96              | 0.1250             | 0.1029              | UCEC        |
| TCGA-AX-A1CI        | 1.16              | 0                  | 0                   | UCEC        |
| TCGA-EY-A1GW        | 1.16              | 0                  | 0                   | UCEC        |
