# Supplementary material for: Human mismatch repair system balances mutation rates between strands by removing more mismatches from the lagging strand
Source: PubMed Central journal article supplement — Genome Res. 2017 Aug;27(8):1336–43. doi: 10.1101/gr.219915.116 (PMC5538550; doi:10.1101/gr.219915.116), 2017-08
Supplement: supp_gr.219915.116_Supplemental_Table_S7.pdf [file supp_gr.219915.116_Supplemental_Table_S7.pdf]

### Supplemental Table S7.

Replication asymmetry in MSI cancers in the most extreme bin and in the entire dataset (data for genomes samples from TCGA database). The values in brackets are 95% confidence intervals.

Asterisks denote significance of the deviation from 1.

\*p:<0.05, \*\*:p< 0.001,\*\*\*:p<0.001.

| <b>Mutation</b> | <b>Rightmost bin</b> | <b>Entire dataset</b> |
|-----------------|----------------------|-----------------------|
| A→G/T→C         | 1.83*** (1.79-1.87)  | 1.28*** (1.27-1.29)   |
| A→C/T→G         | 1.50*** (1.44-1.58)  | 1.18*** (1.15-1.20)   |
| A→T/T→A         | 0.92*** (0.88-0.96)  | 0.97** (0.95-0.99)    |
| C→G/G→C         | 1.04 (0.96-1.12)     | 1.01 (0.97-1.04)      |
| DpC→DpA/GpH→TpH | 0.83*** (0.79-0.87)  | 0.92*** (0.90-0.94)   |
| CpC→CpA/GpG→TpG | 0.48*** (0.46-0.51)  | 0.74*** (0.73-0.76)   |
| HpC→HpT/GpD→ApD | 1.15*** (1.13-1.18)  | 1.06*** (1.04-1.07)   |
| GpC→GpT/GpC→ApC | 1.50*** (1.45-1.54)  | 1.18*** (1.16-1.19)   |
