# Supplementary material for: Human mismatch repair system balances mutation rates between strands by removing more mismatches from the lagging strand
Source: PubMed Central journal article supplement — Genome Res. 2017 Aug;27(8):1336–43. doi: 10.1101/gr.219915.116 (PMC5538550; doi:10.1101/gr.219915.116), 2017-08
Supplement: supp_gr.219915.116_Supplemental_Table_S9.pdf [file supp_gr.219915.116_Supplemental_Table_S9.pdf]

**Supplemental Table S9.**

The ratios of complementary mutation rates on the leading strand in regions belonging to the most extreme replication direction bin in MSI and MSS cancers for different cancer types. Asterisks denote mutation types where asymmetry estimates are unreliable because there were few mutations (<100). The values in brackets are 95% confidence intervals. COAD, colon adenocarcinoma; STAD, stomach adenocarcinoma; UCEC, uterine corpus endometrial carcinoma.

| <b>Whole-exomes data</b> |                   |                   |                   |                   |                  |                  |
|--------------------------|-------------------|-------------------|-------------------|-------------------|------------------|------------------|
|                          | <b>COAD</b>       |                   | <b>UCEC</b>       |                   | <b>STAD</b>      |                  |
| <b>Type</b>              | <b>MSI</b>        | <b>MSS</b>        | <b>MSI</b>        | <b>MSS</b>        | <b>MSI</b>       | <b>MSS</b>       |
| A→C/T→G                  | *1.60 (1.11-2.30) | *1.08 (0.79-1.46) | *0.89 (0.63-1.28) | *0.88 (0.55-1.41) | 1.53 (1.28-1.83) | 1.21 (1.08-1.36) |
| A→G/T→C                  | 1.55 (1.33-1.82)  | 0.90 (0.75-1.09)  | 1.96 (1.74-2.21)  | 1.18 (0.89-1.55)  | 2.01 (1.87-2.16) | 1.07 (0.95-1.21) |
| A→T/T→A                  | *0.94 (0.66-1.34) | *0.90 (0.67-1.22) | *0.89 (0.65-1.22) | *1.28 (0.82-2.01) | 0.64 (0.52-0.77) | 1.17 (0.97-1.40) |
| C→A/G→T                  | 0.74 (0.61-0.88)  | 0.89 (0.76-1.04)  | 0.68 (0.58-0.79)  | 0.90 (0.74-1.09)  | 0.73 (0.66-0.80) | 0.92 (0.81-1.04) |
| C→T/G→A                  | 1.18 (1.09-1.27)  | 0.94 (0.87-1.02)  | 1.25 (1.16-1.34)  | 0.88 (0.78-0.99)  | 1.21 (1.17-1.26) | 0.84 (0.78-0.90) |
| C→G/G→C                  | *0.94 (0.60-1.47) | 0.98 (0.78-1.24)  | *0.79 (0.52-1.19) | 0.75 (0.59-0.96)  | 1.07 (0.83-1.39) | 0.91 (0.78-1.07) |

  

| <b>Whole-genomes data</b> |                  |                  |                  |                  |
|---------------------------|------------------|------------------|------------------|------------------|
|                           | <b>COAD</b>      |                  | <b>UCEC</b>      |                  |
|                           | <b>MSI</b>       | <b>MSS</b>       | <b>MSI</b>       | <b>MSS</b>       |
| A→C/T→G                   | 1.43 (1.35-1.52) | 1.12 (1.05-1.20) | 1.53 (1.43-1.64) | 0.94 (0.80-1.11) |
| A→G/T→C                   | 1.54 (1.49-1.59) | 1.03 (0.97-1.05) | 1.99 (1.94-2.04) | 1.03 (0.92-1.15) |
| A→T/T→A                   | 0.73 (0.69-0.78) | 0.94 (0.87-1.03) | 1.06 (1.01-1.12) | 1.01 (0.87-1.16) |
| C→A/G→T                   | 0.62 (0.60-0.65) | 0.95 (0.90-1.00) | 0.65 (0.62-0.68) | 0.88 (0.80-0.97) |
| C→T/G→A                   | 1.24 (1.22-1.27) | 0.94 (0.90-0.99) | 1.30 (1.27-1.34) | 0.87 (0.81-0.94) |
| C→G/G→C                   | 0.92 (0.83-1.01) | 0.72 (0.65-0.79) | 1.24 (1.11-1.38) | 0.93 (0.80-1.06) |
