# Supplementary material for: Human mismatch repair system balances mutation rates between strands by removing more mismatches from the lagging strand
Source: PubMed Central journal article supplement — Genome Res. 2017 Aug;27(8):1336–43. doi: 10.1101/gr.219915.116 (PMC5538550; doi:10.1101/gr.219915.116), 2017-08
Supplement: supp_gr.219915.116_Supplemental_Table_S11.pdf [file supp_gr.219915.116_Supplemental_Table_S11.pdf]

**Supplementary Table S11.**

Correlation of trinucleotide mutational spectra in MSI samples with wt polymerases and bMMRD samples with mutated polymerases.

| <b>Mutation type</b> | <b>Mutated pol epsilon</b> | <b>Mutated pol delta</b> |
|----------------------|----------------------------|--------------------------|
| C→A                  | 0.59                       | 0.97                     |
| A→G                  | 0.19                       | 0.64                     |
| A→C                  | 0.44                       | 0.89                     |
| C→T                  | 0.82                       | 0.35                     |
| C→G                  | 0.48                       | 0.16                     |
| A→T                  | 0.85                       | -0.02                    |
