# Supplementary material for: Human mismatch repair system balances mutation rates between strands by removing more mismatches from the lagging strand
Source: PubMed Central journal article supplement — Genome Res. 2017 Aug;27(8):1336–43. doi: 10.1101/gr.219915.116 (PMC5538550; doi:10.1101/gr.219915.116), 2017-08
Supplement: supp_gr.219915.116_Supplemental_Table_S12.pdf [file supp_gr.219915.116_Supplemental_Table_S12.pdf]

**Supplemental Table S12.**

Variables in Equation 1 for MMR-specific mutation types.

| <b>A→B</b> | <b><math>x_\epsilon</math></b> | <b><math>x_\delta</math></b> | <b>A'→B'</b> | <b>1- <math>x_\epsilon</math></b> | <b>1- <math>x_\delta</math></b> | <b><math>x_{\text{MMR}}/(1-x_{\text{MMR}})</math></b> | <b>1-<math>\alpha/\alpha</math></b> |
|------------|--------------------------------|------------------------------|--------------|-----------------------------------|---------------------------------|-------------------------------------------------------|-------------------------------------|
| A→G        | 0.547                          | 0.334                        | T→C          | 0.453                             | 0.666                           | 1.81                                                  | 4.27                                |
| C→A        | 0.662                          | 0.675                        | G→T          | 0.338                             | 0.325                           | 0.63                                                  | 4.39                                |
| C→T        | 0.656                          | 0.492                        | G→A          | 0.344                             | 0.508                           | 1.27                                                  | 1.89                                |
