# Supplementary material for: Human mismatch repair system balances mutation rates between strands by removing more mismatches from the lagging strand
Source: PubMed Central journal article supplement — Genome Res. 2017 Aug;27(8):1336–43. doi: 10.1101/gr.219915.116 (PMC5538550; doi:10.1101/gr.219915.116), 2017-08
Supplement: supp_gr.219915.116_Supplemental_Table_S13.pdf [file supp_gr.219915.116_Supplemental_Table_S13.pdf]

**Supplemental Table S13.**

The ratios of complementary mutation rates on the leading strand in regions belonging to the most extreme replication direction bin in MSS, MSI, MSS mutated pol epsilon, MSS mutated pol delta and bMMRD mutated pol epsilon and mutated pol delta cancers.

The values in brackets are 95% confidence intervals. n corresponds to number of samples used.

| <b>Mutation</b> | <b>MSS<br/>(n=782)</b> | <b>MSI<br/>(n=159)</b> | <b>MSS<br/>mutated<br/>pol epsilon<br/>(n=27)</b> | <b>bMMRD<br/>mutated<br/>pol epsilon<br/>(n=5)</b> | <b>MSS<br/>mutated<br/>pol delta<br/>(n=1)</b> | <b>bMMRD<br/>mutated<br/>pol delta<br/>(n=2)</b> |
|-----------------|------------------------|------------------------|---------------------------------------------------|----------------------------------------------------|------------------------------------------------|--------------------------------------------------|
| A→G/T→C         | 1.03 (0.94-1.13)       | 1.92 (1.81-2.03)       | 0.95 (0.88-1.04)                                  | 1.20 (1.02-1.41)                                   | 2.39 (1.94-2.93)                               | 1.98 (1.74-2.26)                                 |
| C→T/G→A         | 0.89 (0.86-0.94)       | 1.22 (1.18-1.27)       | 1.93 (1.86-2.02)                                  | 2.01 (1.93-2.13)                                   | 1.08 (0.91-1.29)                               | 1.09 (0.97-1.23)                                 |
| A→T/T→A         | 1.10 (0.98-1.29)       | 0.73 (0.64-0.86)       | 0.62 (0.49-0.82)                                  | 0.89 (0.50-1.65)                                   | 0.44 (0.30-0.67)                               | 0.63 (0.55-0.75)                                 |
| T→G/A→C         | 0.87 (0.77-0.94)       | 0.72 (0.61-0.81)       | 2.27 (2.05-2.43)                                  | 1.84 (1.32-2.46)                                   | 0.54 (0.29-0.97)                               | 0.66 (0.44-0.94)                                 |
| C→A/G→T         | 0.92 (0.85-1.00)       | 0.72 (0.68-0.78)       | 2.14 (2.05-2.26)                                  | 1.97 (1.79-2.19)                                   | 0.51 (0.36-0.74)                               | 0.48 (0.42-0.56)                                 |
| C→G/G→C         | 0.86 (0.78-0.97)       | 0.98 (0.81-1.20)       | 0.74 (0.49-1.11)                                  | 0.69 (0.28-1.78)                                   | 0.43 (0.17-1.08)                               | 0.63 (0.25-1.59)                                 |
