# Supplementary material for: Resonance instability of a bounded plasma with inhomogeneous electron velocity profile
Source: HighWire-hosted journal article supplement (doi:10.1101/gr.219915.116), 1975-11-01
Supplement: Supplemental_Table_S5.xlsx [file Supplemental_Table_S5.xlsx]

## Sheet: Лист1
Sample	Cancer type	MSI/MSS status	S1	S2	S3	S4	S5	S6	S7	S8	S9	S10	S11	S12	S13	S14	S15	S16	S17	S18	S19	S20	S21	S22	S23	S24	S25	S26	S27	S28	S29	S30
TCGA-AA-3516	COAD	MSI	-	-	-	-	0.1	0.22	-	-	0.07	-	-	0.09	-	0.1	0.13	-	0.08	-	-	-	-	-	-	-	-	0.07	-	-	-	-
TCGA-AA-A01R	COAD	MSI	0.26	-	-	-	-	0.4	-	-	-	-	-	0.07	-	-	-	-	-	-	-	-	-	-	-	-	-	0.07	-	-	-	-
TCGA-D5-6540	COAD	MSI	-	-	-	-	-	0.38	-	0.1	0.07	-	-	0.1	-	0.13	0.15	-	-	-	-	-	-	-	-	-	-	-	-	-	-	-
TCGA-A5-A0G9	UCEC	MSI	0.07	-	-	-	0.2	0.32	-	0.15	-	-	-	0.07	-	-	-	-	-	-	-	0.1	-	-	-	-	-	-	-	-	-	0.08
TCGA-A5-A0GA	UCEC	MSI	-	-	-	-	0.14	0.32	-	-	-	-	-	0.12	-	0.07	-	-	-	-	-	0.22	-	-	-	-	-	-	-	-	-	-
TCGA-AP-A054	UCEC	MSI	-	-	-	-	-	-	-	-	0.1	-	-	0.21	-	-	-	-	-	-	-	0.07	-	-	-	-	-	0.59	-	-	-	-
TCGA-AP-A0LD	UCEC	MSI	0.19	-	-	-	-	0.18	-	-	0.07	-	-	0.17	-	-	-	-	-	-	-	0.26	-	-	-	-	-	0.12	-	-	-	-
TCGA-AP-A0LE	UCEC	MSI	-	-	-	-	0.2	0.3	-	-	-	-	-	0.11	-	-	-	-	-	-	-	0.26	-	-	-	-	-	-	-	-	-	0.07
TCGA-AX-A05S	UCEC	MSI	0.13	-	-	-	0.22	0.45	-	-	-	-	-	-	-	-	-	-	-	-	-	0.1	-	-	-	-	-	-	-	-	-	-
TCGA-A5-A0GG	UCEC	MSI	0.1	-	-	-	0.17	0.27	-	-	-	-	-	0.12	-	-	-	-	-	-	-	0.28	-	-	-	-	-	-	-	-	-	0.06
TCGA-A6-2681	COAD	MSS	0.39	-	-	-	-	-	-	0.24	0.09	-	-	-	-	-	-	-	0.1	0.09	-	-	-	-	-	-	-	-	-	-	-	-
TCGA-A6-2683	COAD	MSS	0.22	-	-	-	-	-	-	0.07	0.25	-	-	-	-	-	-	-	0.27	0.14	-	-	-	-	-	-	-	-	-	-	-	-
TCGA-AA-3666	COAD	MSS	0.12	-	-	-	-	-	-	0.2	0.15	-	-	-	-	-	-	-	0.29	-	-	-	-	-	-	-	-	-	-	-	-	-
TCGA-AA-3956	COAD	MSS	0.3	-	-	-	-	-	-	0.18	0.23	-	-	-	-	-	-	-	-	0.08	-	-	-	-	-	-	-	-	-	-	-	-
TCGA-AA-A01S	COAD	MSS	0.46	-	-	-	-	-	-	0.14	0.12	-	-	-	-	-	-	-	-	0.18	-	-	-	-	-	-	-	-	-	-	-	-
TCGA-AA-A02O	COAD	MSS	0.27	-	-	-	-	-	-	0.15	0.26	-	-	-	-	-	-	-	0.09	0.15	-	-	-	-	-	-	-	-	-	-	-	-
TCGA-AA-A02Y	COAD	MSS	0.3	-	-	-	-	-	-	0.2	0.14	-	-	-	-	-	-	-	-	0.22	-	-	-	-	-	-	-	-	-	-	-	-
TCGA-AA-A03F	COAD	MSS	0.35	-	-	-	-	-	-	0.1	0.18	-	-	-	-	-	-	0.07	0.07	0.12	-	-	-	-	-	-	-	-	-	-	-	-
TCGA-A5-A0GE	UCEC	MSS	0.37	-	0.09	-	0.08	-	-	0.15	0.09	-	-	-	-	-	-	-	-	0.15	-	-	-	-	-	-	-	-	-	-	-	-
TCGA-AP-A052	UCEC	MSS	0.32	-	-	-	0.28	-	-	0.16	-	-	-	-	-	-	-	-	-	-	-	-	-	-	-	-	-	-	-	-	-	-
TCGA-AP-A053	UCEC	MSS	0.3	-	0.16	-	0.13	-	-	0.13	-	-	-	-	-	-	-	0.09	-	-	-	-	-	-	-	-	-	-	-	-	-	-
TCGA-AP-A05A	UCEC	MSS	0.21	-	0.3	-	-	-	-	0.14	-	-	-	-	0.09	-	-	0.1	-	-	-	-	-	-	-	-	-	-	-	-	-	-
TCGA-AP-A05D	UCEC	MSS	0.31	-	-	-	0.15	-	-	0.22	-	-	-	-	-	-	-	-	-	-	-	-	-	-	-	-	-	-	-	-	-	-
TCGA-AP-A0L8	UCEC	MSS	0.18	-	0.23	-	0.28	-	-	0.21	-	-	-	-	-	-	-	-	-	-	-	-	-	-	-	-	-	-	-	-	-	-
TCGA-AP-A0L9	UCEC	MSS	0.13	0.1	0.22	-	-	-	-	0.23	0.06	-	-	-	0.14	-	-	-	-	-	-	-	-	-	-	-	-	-	-	-	-	-
TCGA-AP-A0LH	UCEC	MSS	0.3	-	0.07	-	0.09	-	-	0.14	0.11	-	-	-	-	-	-	0.14	-	-	-	-	-	-	-	-	-	-	-	-	-	-
TCGA-AP-A0LI	UCEC	MSS	0.06	0.16	0.26	-	-	-	-	0.14	0.07	-	-	-	0.17	-	-	0.09	-	-	-	-	-	-	-	-	-	-	-	-	-	-
TCGA-AP-A0LL	UCEC	MSS	0.37	-	-	-	0.22	-	-	-	-	-	-	-	-	-	-	-	-	0.12	-	-	-	-	-	-	-	-	-	-	-	-
TCGA-AP-A0LO	UCEC	MSS	-	-	-	0.33	-	-	-	-	-	-	-	-	-	-	-	-	-	0.58	-	0.08	-	-	-	-	-	-	-	-	-	-
TCGA-B5-A0JN	UCEC	MSS	0.1	0.07	0.36	-	-	-	-	0.24	-	-	-	-	0.11	-	-	-	-	-	-	-	-	-	-	-	-	-	-	-	-	-
TCGA-BK-A0CC	UCEC	MSS	0.22	0.15	0.14	-	-	-	-	0.14	-	-	-	-	0.16	-	-	0.11	-	-	-	-	-	-	-	-	-	-	-	-	-	-
TCGA-BS-A0TC	UCEC	MSS	-	-	-	-	-	-	-	-	-	0.93	-	-	-	-	-	-	-	0.07	-	-	-	-	-	-	-	-	-	-	-	-
TCGA-BS-A0TD	UCEC	MSS	0.5	-	-	-	0.12	-	-	0.09	-	-	-	-	-	-	-	0.12	-	0.08	-	-	-	-	-	-	-	-	-	-	-	-
TCGA-BS-A0TG	UCEC	MSS	0.55	-	0.07	-	-	-	-	0.1	0.06	-	-	-	-	-	-	0.09	-	0.11	-	-	-	-	-	-	-	-	-	-	-	-
TCGA-D1-A16G	UCEC	MSS	0.33	0.12	-	-	0.18	-	-	0.12	-	-	-	-	0.1	-	-	-	-	-	-	-	-	-	-	-	-	-	-	-	-	-
TCGA-AX-A1CI	UCEC	MSS	0.46	-	-	-	0.14	-	-	0.16	0.07	-	-	-	-	-	-	-	-	0.07	-	-	-	-	-	-	-	-	-	-	-	-
TCGA-EY-A1GW	UCEC	MSS	0.381585	-	0.129293	-	0.0772948	-	-	0.201996	0.089363	-	-	-	-	-	-	-	-	-	-	-	-	-	-	-	-	-	-	-	-	-
